# Supplementary material
Source: HighWire-hosted journal article supplement (https://www.annfammed.org/highwire/filestream/17075/field_highwire_adjunct_files/0/Tressan-Supp-App.pdf)
Supplement: Tressan-Supp-App.pdf [file Tressan-Supp-App.pdf]

## Supplemental materials for

Tressan A, Nyandak D, Srinivasulu S, Fiastro AE, MacNaughton H, Godfrey EM. Telemedicine abortion in primary care: an exploration of patient experiences. *Ann Fam Med*. 2024;22(1):19-25.

## Supplemental Appendix

### Interview Guide Details

#### 1.0 Interview guide themes

The final interview guide asked participants to share their experiences regarding appointment scheduling, learning about the TeleMAB option, provider communication, medication delivery, and perceptions of receiving TeleMAB from their own primary care network.

#### 2.0 Interview guide questions assessing acceptability

“Now I’d like to step back for a moment and talk about the whole experience - finding CHA, scheduling the appointment, having your telehealth visit, and getting and taking the abortion pills.

What went well?

What didn’t go so well?

[Probe]: What do you think would have made it a better experience? Why is that?

If you could go back in time to schedule this appointment, would you have still chosen the telehealth visit or would you have preferred to go into the clinic for the abortion? Why is that?

How did you feel about getting abortion care at a place where you could get other kinds of health care? (For example, a check-up, physical, sore throat, diabetes/blood pressure management...)”

#### 3.0 Process of pretesting interview guide

We conducted interviews in English, Spanish, and Portuguese. SS and AF pre-tested the interview guides with one Spanish and one Portuguese speaker, respectively. SS has an American Council on the Teaching of Foreign Languages (ACTFL) Examination rating of Superior-Fluent in Spanish and AF has extensive experience living and working using Portuguese. SS completed three cognitive interviews with women of reproductive age who live in an urban area on the East Coast and have had a reproductive health-related visit in the last year. SS went through the interview guide questions with them and after each question, asked them to explain what they thought the interviewer was asking them to see if they were interpreting the question as intended. They were also asked if any of the questions were confusing and had any suggestions for rephrasing.

#### 4.0 Specific sociodemographic characteristics collected

Gender, age, race/ethnicity, zip code, occupation, parenting status, ages of children.
